# Supplementary material
Source: publisher site journal article supplement (http://www.spandidos-publications.com/3957/downloadSupplementary)
Supplement: Supplementary file 1 [file downloadSupplementary]

## Sheet: OVC_vs_OV_down_enrichment
Table SX. KEGG Enrichment of downregulated differentially expressed genes between ovarian cancer and healthy ovary tissue groups.
KEGG ID	P-value	OddsRatio	ExpCount	Count	Size	Term
100	6.64×10^-06	15.0459	0.46402	6	48	Steroid biosynthesis
140	0.000445314	8.58197	0.638027	5	66	Steroid hormone biosynthesis
340	0.008268926	7.78255	0.415684	3	43	Histidine metabolism
350	0.000358529	9.02716	0.609026	5	63	Tyrosine metabolism
360	0.008811727	7.59237	0.425351	3	44	Phenylalanine metabolism
900	0.000926643	10.1735	0.435018	4	45	Terpenoid backbone biosynthesis
950	0.001041295	17.3127	0.203009	3	21	Isoquinoline alkaloid biosynthesis
982	0.006034656	4.58048	1.15038	5	119	Drug metabolism - cytochrome P450
2000	0.001102585	2.2067	10.7015	22	1107	Transporters
3320	0.002028917	4.87835	1.30506	6	135	PPAR signaling pathway
4913	1.17×10^-05	8.32049	1.06338	8	110	Ovarian steroidogenesis
4920	0.00089074	5.77899	1.11171	6	115	Adipocytokine signaling pathway
4960	2.23×10^-06	13.4639	0.599359	7	62	Aldosterone-regulated sodium reabsorption
4961	0.005226671	6.12613	0.696029	4	72	Endocrine and other factor-regulated calcium reabsorption
4964	7.17×10^-05	13.1006	0.435018	5	45	Proximal tubule bicarbonate reclamation
4978	0.004491452	6.4098	0.667028	4	69	Mineral absorption
5030	0.000547055	8.17852	0.667028	5	69	Cocaine addiction
5031	0.002304461	5.80861	0.918372	5	95	Amphetamine addiction
5033	0.00676138	8.41477	0.386683	3	40	Nicotine addiction
5034	0.006458697	3.8074	1.65307	6	171	Alcoholism
